# Supplementary material
Source: PubMed Central journal article supplement (PMC7723959)
Supplement: JB.00312-20-s0001.pdf [file JB.00312-20-s0001.pdf]

# **Two SRP signal sequences are present in the amino-terminal domain of the C-tailed protein SciP**

Eva Pross and Andreas Kuhn\*

Institute of Microbiology,  
University of Hohenheim,  
70599 Stuttgart, Germany

\* Corresponding author

Tel.: 0049-711-459-22222

Fax: 0049-711-459-22238

E-mail: [andikuhn@uni-hohenheim.de](mailto:andikuhn@uni-hohenheim.de)

## Supplementary Information

Figure S1

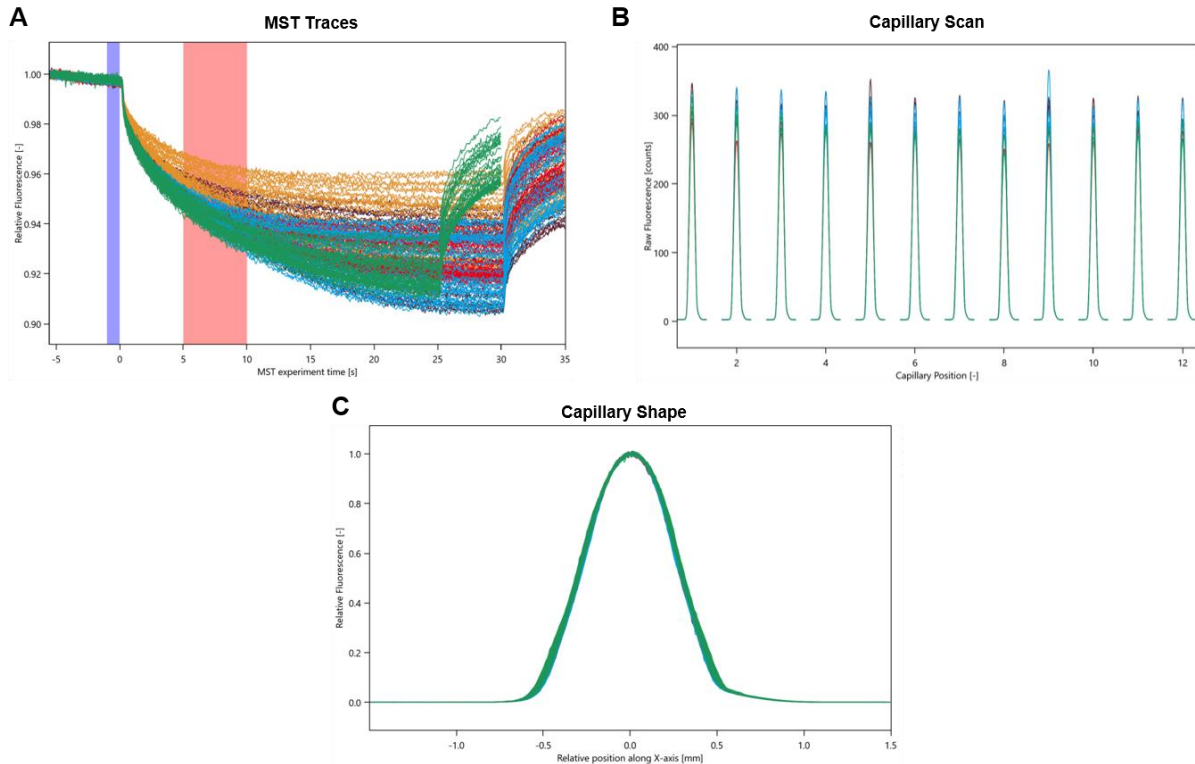

**Supplementary Figure S1: Raw data of the MST measurements with FtsQ4-85, SciP2-54, SciP54-100, SciP54-100 C68S and Luc2-50 as a nascent chain with SRP.**

Microscale thermophoresis measurements of unlabelled SRP (1  $\mu$ M to 0.49 nM) with labelled RNCs (5 nM) of FtsQ4-85 (blue), SciP2-54 (brown), SciP54-100 (orange), SciP54-100 C68S (red) and Luc2-50 (green). The samples were incubated for 5 min on ice and filled into Premium capillaries (NanoTemper Technologies) for the MST measurements. In A, the MST traces (relative fluorescence [-]) are plotted against the MST experiment [s], in B, the Capillary Scan (raw fluorescence [counts]) is plotted against the capillary position [-] and in C, the Capillary Shape (relative fluorescence [-]) is plotted against the relative position along x-axis [mm].

**Supplementary Table S1: Dataset overview of the MST measurements with FtsQ4-85, SciP2-54, SciP54-100, SciP54-100 C68S and Luc2-50 as a nascent chain with SRP.**

| Name                      | FtsQ4-85 vs SRP                                                                   | SciP2-54                                                                          | SciP54-100                                                                        | SciP54-100 C68S                                                                     | Luc2-50                                                                             |
|---------------------------|-----------------------------------------------------------------------------------|-----------------------------------------------------------------------------------|-----------------------------------------------------------------------------------|-------------------------------------------------------------------------------------|-------------------------------------------------------------------------------------|
| Graph Color:              |  |  |  |  |  |
| Target Concentration:     | 5 nM                                                                              | 5 nM                                                                              | 5 nM                                                                              | 5 nM                                                                                | 5 nM                                                                                |
| Ligand Concentration:     | 1E+03 to 0.488 nM                                                                   | 1E+03 to 0.488 nM                                                                   |
| n:                        | 3                                                                                 | 3                                                                                 | 3                                                                                 | 3                                                                                   | 3                                                                                   |
| Excitation Power:         | 50%                                                                               | 50%                                                                               | 50%                                                                               | 50%                                                                                 | 40%                                                                                 |
| MST Power:                | 20%                                                                               | 20%                                                                               | 20%                                                                               | 20%                                                                                 | 20%                                                                                 |
| Temperature:              | 22.0°C                                                                            | 22.0°C                                                                            | 22.0°C                                                                            | 22.0°C                                                                              | 22.0°C                                                                              |
| Kd:                       | 30.552 nM                                                                         | 49.716 nM                                                                         | 56.984 nM                                                                         | 112.07 nM                                                                           | 22[Fixed]                                                                           |
| Kd Confidence:            | ± 5.9552 nM                                                                       | ± 12.034 nM                                                                       | ± 7.6201 nM                                                                       | ± 33.187 nM                                                                         |                                                                                     |
| Response Amplitude:       | 9.6515643                                                                         | 13.166952                                                                         | 16.78356                                                                          | 4.3734844                                                                           | 0                                                                                   |
| Target Conc.:             | 5 nM [Fixed]                                                                      | 5 nM [Fixed]                                                                      | 5 nM [Fixed]                                                                      | 5 nM [Fixed]                                                                        | 5 nM [Fixed]                                                                        |
| Unbound:                  | 941.45                                                                            | 944.15                                                                            | 950.7                                                                             | 946.1                                                                               | 942.9[Fixed]                                                                        |
| Bound:                    | 951.1                                                                             | 957.32                                                                            | 967.49                                                                            | 950.47                                                                              | 942.9[Fixed]                                                                        |
| Std. Error of Regression: | 0.49673909                                                                        | 0.82411441                                                                        | 0.57370651                                                                        | 0.29939916                                                                          | 1.0688193                                                                           |
| Reduced $\chi^2$ :        | 3.5214633                                                                         | 1.2164738                                                                         | 9.1310442                                                                         | 0.71247396                                                                          | 10.606039                                                                           |
| Signal to Noise:          | 21.480504                                                                         | 17.663341                                                                         | 32.342187                                                                         | 16.14924                                                                            | 0                                                                                   |

**Figure S2**

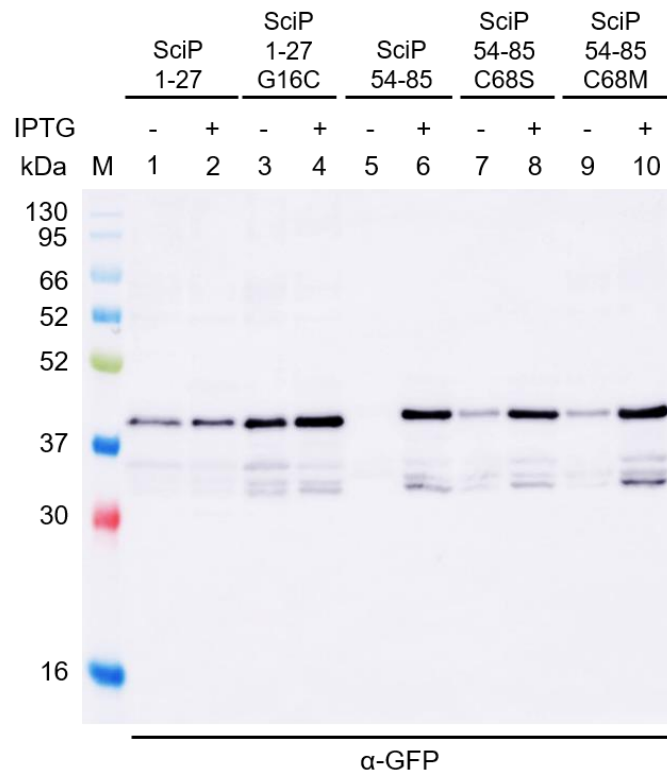

**Supplementary Figure S2: Expression of the different SciP-sfGFP fusion proteins in *E. coli* MC4100**

The sequences encoding the peptides 1-27 or 54-85 of SciP and their variants G16C, C68S and C68M were fused to the N-terminus of sfGFP extended with residues 96-217 of SciP at the C-terminus. The expression was induced with 1 mM IPTG at an OD<sub>600</sub> of 0.5 for 1h at 30°C. The cells were TCA precipitated and loaded on a 12% SDS-PAGE. After Western transfer, immunodetection was carried out with α-GFP and α-rabbit antibodies. After induction a band between 37 and 52 kDa was detected, corresponding to the respective SciP-sfGFP fusion protein.

**Figure S3**

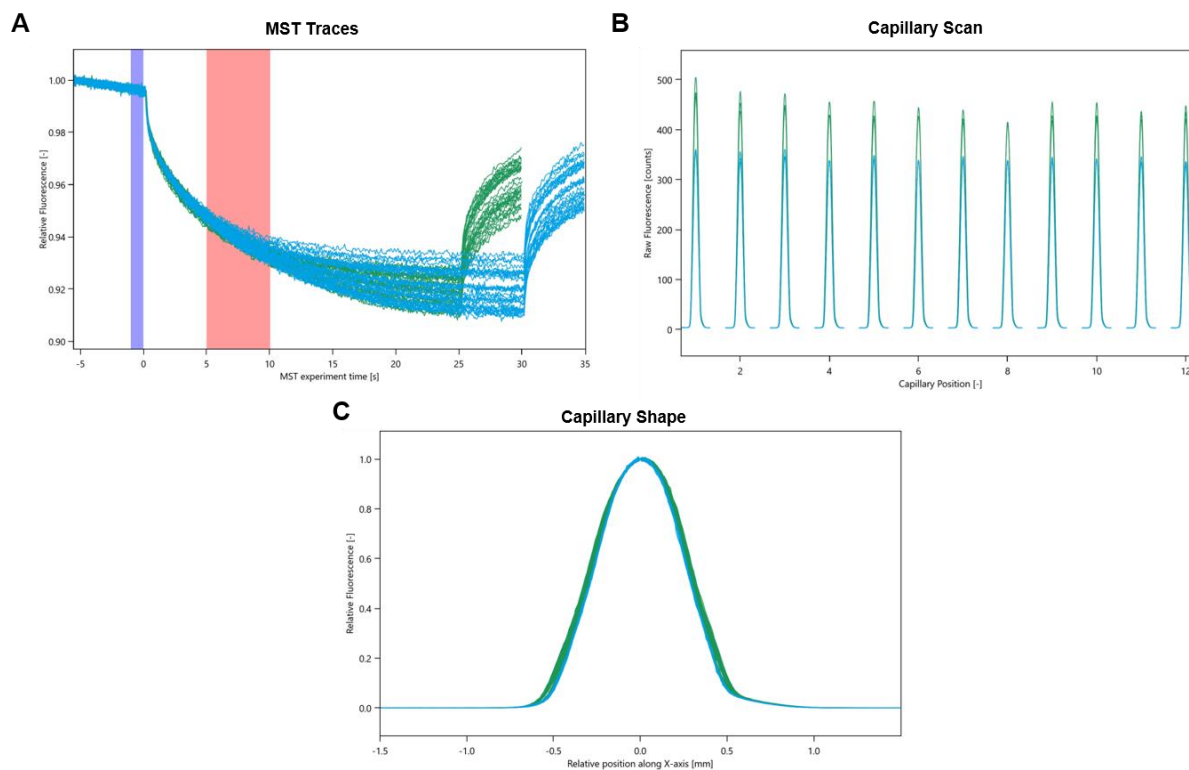

**Supplementary Figure S3: Raw data of the MST measurements with FtsQ4-85 and Luc2-50 as a nascent chain with SRP-FtsY.**

Microscale thermophoresis measurements of unlabelled SRP-FtsY (500 / 250 nM to 0.244 / 0.122 nM) with labelled RNCs (5 nM) of FtsQ4-85 (blue) and Luc2-50 (green). The samples were incubated for 5 min on ice and filled into Premium capillaries (NanoTemper Technologies) for the MST measurements. In A, the MST traces (relative fluorescence [-]) are plotted against the MST experiment [s], in B, the Capillary Scan (raw fluorescence [counts]) is plotted against the capillary position [-] and in C, the Capillary Shape (relative fluorescence [-]) is plotted against the relative position along x-axis [mm].

**Figure S4**

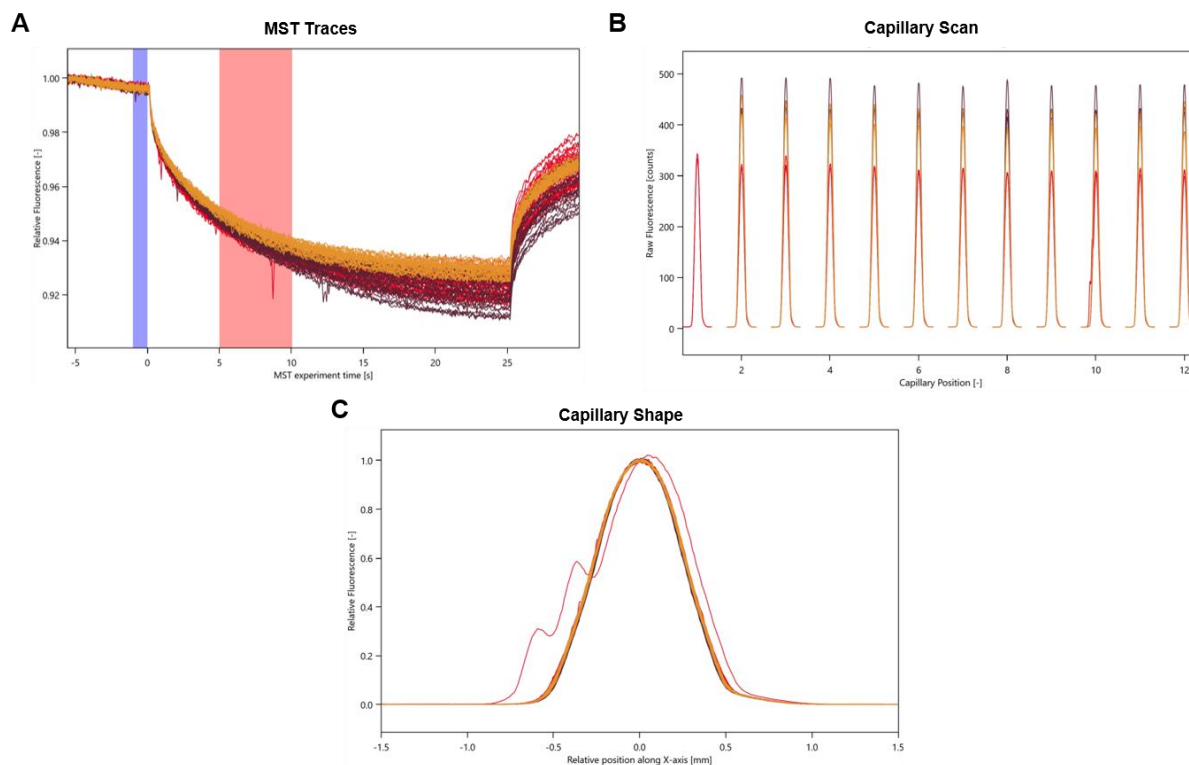

**Supplementary Figure S4: Raw data of the MST measurements with SciP2-54, SciP54-100 and SciP54-100 C68S as a nascent chain with SRP-FtsY.**

Microscale thermophoresis measurements of unlabelled SRP-FtsY (500 / 250 nM to 0.244) with labelled RNCs (5 nM) of SciP2-54 (brown), SciP54-100 (orange) and SciP54-100 C68S (red). The samples were incubated for 5 min on ice and filled into Premium capillaries (NanoTemper Technologies) for the MST measurements. In A, the MST traces (relative fluorescence [-]) are plotted against the MST experiment [s], in B, the Capillary Scan (raw fluorescence [counts]) is plotted against the capillary position [-] and in C, the Capillary Shape (relative fluorescence [-]) is plotted against the relative position along x-axis [mm].

**Supplementary Table S2: Dataset overview of the MST measurements with FtsQ4-85, SciP2-54, SciP54-100, SciP54-100 C68S and Luc2-50 as a nascent chain with SRP-FtsY.**

| Name                      | FtsQ4-85 vs SRP                                                                   | SciP2-54                                                                          | SciP54-100                                                                        | SciP54-100 C68S                                                                     | Luc2-50                                                                             |
|---------------------------|-----------------------------------------------------------------------------------|-----------------------------------------------------------------------------------|-----------------------------------------------------------------------------------|-------------------------------------------------------------------------------------|-------------------------------------------------------------------------------------|
| Graph Color:              |  |  |  |  |  |
| Target Concentration:     | 5 nM                                                                              | 5 nM                                                                              | 5 nM                                                                              | 5 nM                                                                                | 5 nM                                                                                |
| Ligand Concentration:     | 250 to 0.122 nM                                                                   | 250 to 0.244 nM                                                                   | 250 to 0.244 nM                                                                   | 500 to 0.244 nM                                                                     | 500 to 0.244 nM                                                                     |
| n:                        | 3                                                                                 | 3                                                                                 | 3                                                                                 | 3                                                                                   | 3                                                                                   |
| Excitation Power:         | 60%                                                                               | 60%                                                                               | 60%                                                                               | 60%                                                                                 | 60%                                                                                 |
| MST Power:                | 20%                                                                               | 20%                                                                               | 20%                                                                               | 20%                                                                                 | 20%                                                                                 |
| Temperature:              | 22.0°C                                                                            | 22.0°C                                                                            | 22.0°C                                                                            | 22.0°C                                                                              | 22.0°C                                                                              |
| Kd:                       | 22.932 nM                                                                         | 0.79589 nM                                                                        | 10.763 nM                                                                         | 11[Fixed]                                                                           | 7.8[Fixed]                                                                          |
| Kd Confidence:            | ± 10.75 nM                                                                        | ± 1.1838 nM                                                                       | ± 3.5898 nM                                                                       |                                                                                     |                                                                                     |
| Response Amplitude:       | 4.8508007                                                                         | 3.0604397                                                                         | 2.3097048                                                                         | 0                                                                                   | 0                                                                                   |
| Target Conc.:             | 5 nM [Fixed]                                                                      | 5 nM [Fixed]                                                                      | 5 nM [Fixed]                                                                      | 5 nM [Fixed]                                                                        | 5 nM [Fixed]                                                                        |
| Unbound:                  | 941.56                                                                            | 942.08                                                                            | 946.23                                                                            | 942.68[Fixed]                                                                       | 942.59[Fixed]                                                                       |
| Bound:                    | 946.41                                                                            | 945.14                                                                            | 948.54                                                                            | 942.68[Fixed]                                                                       | 942.59[Fixed]                                                                       |
| Std. Error of Regression: | 0.50948147                                                                        | 0.61162167                                                                        | 0.174534                                                                          | 0.60178988                                                                          | 0.46206252                                                                          |
| Reduced $\chi^2$ :        | 6.8864189                                                                         | 3.9633787                                                                         | 0.9442135                                                                         | 0.71951065                                                                          | 2.5531429                                                                           |
| Signal to Noise:          | 10.525922                                                                         | 5.5944316                                                                         | 14.795562                                                                         | 0                                                                                   | 0                                                                                   |

**Figure S5**

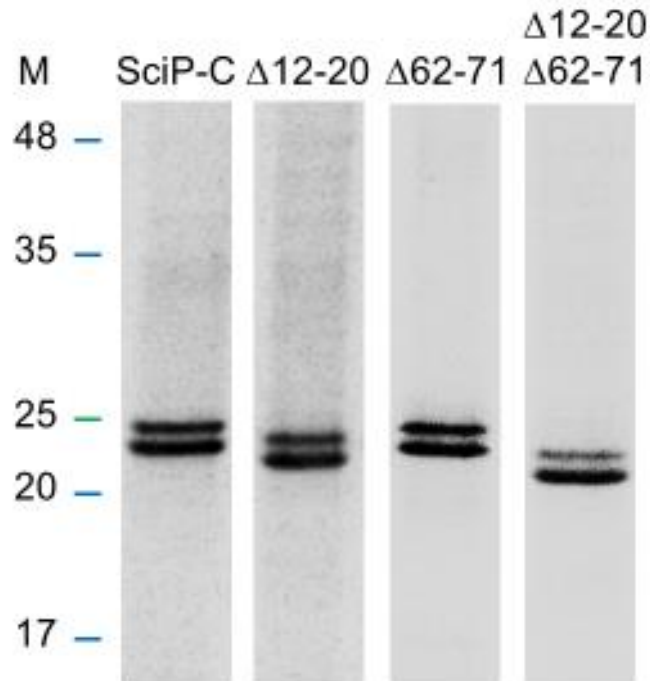

**Supplementary Figure S5: Cysteine accessibility assay of SciP-C and the mutant proteins with AMS.** The C-tail of the SciP variants with deletions of one or both hydrophobic regions was extended by a cysteine residue at position 218 and expressed in *E. coli* MC4100 cells. The expression was induced with 1 mM IPTG for 10 min, 2.5 mM AMS was added 1 min prior to pulse labeling with <sup>35</sup>S-methionine / cysteine (15-30 μCi/ml culture) for 2 min. The cells were chased for 10 min with non-labeled methionine / cysteine, immunoprecipitated against the N-terminal His<sub>10</sub>-Tag and analyzed on a 14% SDS-PAGE. The modification of the cysteine residue at position 218 leads to a mobility shift if its exposed in the periplasm.
